# Supplementary material
Source: Springer Nature journal article supplement (https://www.springermedizin.de/resource/supplementary/12911_2010_322_MOESM4_ESM.pdf/9525480)
Supplement: MOESM4 [file 9525480]

| <b>Participant</b> | <b>Gender</b> | <b>Professional background</b>  | <b>Role or area of expertise*</b> |
|--------------------|---------------|---------------------------------|-----------------------------------|
| 1                  | F             | General practitioner            | 1,2                               |
| 2                  | F             | General practitioner            | 1,3,4                             |
| 3                  | M             | General practitioner            | 1,3,4                             |
| 4                  | M             | General practitioner            | 1,3,4                             |
| 5                  | M             | General practitioner            | 1,5                               |
| 6                  | M             | Hospital medical specialist     | 1,3,5                             |
| 7                  | M             | Clinician, health informatician | 5                                 |
| 8                  | M             | Clinician, health informatician | 5                                 |
| 9                  | F             | Health informatics researcher   | 2,5                               |
| 10                 | M             | Pharmacist - hospital           | 1,2                               |
| 11                 | M             | Pharmacist - community          | 1,2                               |
| 12                 | F             | Consumer                        | 6                                 |
